# 1 Reorganization of F-actin nanostructures is required for the late phases of 2 SARS-CoV-2 replication in pulmonary cells.

3  
4 Jitendriya Swain<sup>1</sup>, Peggy Merida<sup>1</sup>, Karla Rubio<sup>2, 3, 4</sup>, David Bracquemond<sup>1</sup>, Israel Aguilar-  
5 Ordoñez<sup>5</sup>, Stefan Günther<sup>6</sup>, Guillermo Barreto<sup>2, 3, 4</sup>, Delphine Muriaux<sup>1\*</sup>.

## 6 Affiliations

7  
8 <sup>1</sup>Institute of Research in Infectiology of Montpellier (IRIM), University of Montpellier, UMR9004 CNRS,  
9 Montpellier, France. <sup>2</sup>Université de Lorraine, CNRS, Laboratoire IMoPA, UMR 7365, F-54000 Nancy,  
10 France. <sup>3</sup>Univ Paris Est Creteil, Glycobiology, Cell Growth and Tissue Repair Research Unit (Gly-  
11 CRRET), Brain and Lung Epigenetics (BLUE), Creteil, France. <sup>4</sup>International Laboratory EPIGEN,  
12 Universidad de la Salud del Estado de Puebla, 72308 Puebla, Mexico. <sup>5</sup>Instituto Nacional de Medicina  
13 Genómica (INMEGEN), Mexico city, Mexico. <sup>6</sup>ECCPS Bioinformatics and Deep Sequencing, Max-  
14 Planck-Institute for Heart and Lung Research, 61231 Bad Nauheim, Germany.

15 \*correspondence: [delphine.muriaux@irim.cnrs.fr](mailto:delphine.muriaux@irim.cnrs.fr)

## 16 Abstract

17  
18 The severe acute respiratory syndrome coronavirus 2 (SARS-CoV-2) is worldwide the  
19 main cause of the COVID-19 pandemic. After infection of human pulmonary cells,  
20 intracellular viral replication take place in different cellular compartments resulting in the  
21 destruction of the host cells and causing severe respiratory diseases. Although cellular  
22 trafficking of SARS-CoV-2 have been explored, little is known about the role of the  
23 cytoskeleton during viral replication in pulmonary cells. Here we show that SARS-CoV-2  
24 infection induces dramatic changes of F-actin nanostructures overtime. Ring-like actin  
25 nanostructures are surrounding viral intracellular organelles, suggesting a functional  
26 interplay between F-actin and viral M clusters during particle assembly. Filopodia-like  
27 structures loaded with viruses to neighbour cells suggest these structures as mechanism for  
28 cell-to-cell virus transmission. Strikingly, gene expression profile analysis and PKN  
29 inhibitor treatments of infected pulmonary cells reveal a major role of alpha-actinins  
30 superfamily proteins in SARS-CoV-2 replication. Overall, our results highlight cell actors  
31 required for SARS-CoV2 replication that are promises for antiviral targets.

32  
33 **Teaser : Impairing regulation of actin filaments inhibits SARS-CoV-2 particle production in**  
34 **human pulmonary cells.**

35  
36 **Keywords: SARS-CoV-2; F-actin nanostructures; alpha-actinins; Transcriptomic; STED**  
37 **microscopy**

## 38 Introduction

39  
40 SARS-CoV-2 is worldwide a major public health burden as the main cause of the still  
41 ongoing COVID-19 pandemic with almost 244 million confirmed cases in 190 countries  
42 and more than 5 million deaths until now (1). SARS-CoV-2 infects mainly human  
43 pulmonary cells destroying the target cells and causing severe respiratory diseases with  
44 excessive inflammation capable of inducing respiratory failure, multi-organ failure and  
45 death (2). SARS-CoV-2 is an enveloped virus with a positive sense, single-stranded RNA  
46 genome and belongs to the Beta coronavirus family (3,4,5). After SARS-CoV-2 infection

47 of target cells, intracellular viral replication take place consisting of a series of complex  
48 processes (e.g., viral RNA translation, particle packaging, assembly and release) that are  
49 tightly orchestrated to one another and often mutually exclusive (reviewed in 6). Viral  
50 translation often takes place first in order to create a stock of viral proteins that will serve  
51 to assemble the newly made viral particles. The SARS-CoV-2 transcriptome consists of a  
52 long unspliced genomic RNA and 9 sub-genomic RNAs that are generated by alternative  
53 splicing. After viral RNA translation, once the structural nucleocapsid protein N is  
54 produced in the cytosol of infected cells, SARS-CoV-2 assembly continues with the  
55 interactions of the N proteins with the unspliced genomic RNA. These interactions lead to  
56 a ribonucleoprotein complex that will assemble at the membrane of the Endoplasmic  
57 Reticulum – Golgi intermediate Compartment (ERGIC) with the structural proteins  
58 transmembrane (M), envelop protein (E) and spike protein (S) (7,8,9). The viral particles,  
59 ranging between 90 and 200 nm as recently described (7,8,10,11), will bud from the  
60 ERGIC and egress through the secretory pathway. A number of studies over the years  
61 have shown that most viruses hijack the cytoskeletal network to fulfill their own  
62 replication cycle, which motivated us to perform a detail study on the role of the  
63 cytoskeleton during SARS-CoV-2 infection in human host pulmonary cells (12,13,14).

64 The cytoskeleton is a complex and dynamic network of protein filaments in the cytoplasm  
65 of the cells, extending from the cell nucleus to the cell membrane. Its primary function is  
66 to give the cell its morphology and mechanical resistance to deformation (15). In addition,  
67 the cytoskeleton has been related to many different cellular processes including cell  
68 migration, cell signalling, endocytosis, cell division, chromosome segregation,  
69 intracellular transport, etc (12, 16,17, 18). It can also build specialized structures, such as  
70 flagella, cilia, lamellipodia and podosomes. In eukaryotic cells, the cytoskeleton consists  
71 of three main components: microfilaments, intermediate filaments and microtubules, and  
72 all these components are rapidly growing or disassembling depending on the requirements  
73 of the cell. Microfilaments are mainly composed of linear polymers of G-actin proteins.  
74 The G-actin monomer combines to form a polymer which continues to form the actin  
75 filament. These actin filament subunits assemble into two chains that intertwine into  
76 nanostructures called F-actin chains or fibers (15). F-actin fibers generate force when the  
77 growing end of the actin filaments push against a barrier, such as the cell membrane. They  
78 also act as tracks for the movement of myosin molecules that affix to the microfilament  
79 and "move" along them. Interestingly, the network of F-actin fibers under the plasma  
80 membrane can be a carrier for virus entry or transfer from one cell to other (12,17).  
81 Although mechanisms of trafficking implicated in SARS-CoV-2 infection have been  
82 explored mostly in simian Vero cell lines (19,20), little is known about the participation of  
83 F-actin nanostructures during SARS-CoV-2 replication in human pulmonary cells. Here,  
84 we implemented confocal and super-resolution 2D and 3D STED microscopy (21) to  
85 study the kinetics of M cluster formation during SARS-CoV-2 particle assembly and  
86 release, as well as the effects of SARS-CoV-2 infection on the morphology of human  
87 pulmonary cells as consequence of intracellular rearrangements of F-actin nanostructures.  
88 The human pulmonary A549-hACE2 cells implemented here are a well-established  
89 experimental model for SARS-CoV-2 research due to their high susceptibility to SARS-  
90 CoV-2 infection, which can be explained by the stably overexpression of the host receptor  
91 protein for the viral S protein (human angiotensin-converting enzyme 2, hACE2) and the  
92 presence of the the co-receptor (human transmembrane protease serine 2, TMPRSS2) (22).  
93 Our results demonstrate that the kinetics of M cluster formation during SARS-CoV-2  
94 particle assembly and release correlate with rearrangements of intracellular F-actin fibers  
95 and morphological changes of SARS-CoV-2-infected human pulmonary A549-hACE2

96 cells. Moreover, we show that the reorganization of F-actin nanostructures is required for  
97 SARS-CoV-2 replication in human pulmonary A549-hACE2 cells.

## 98 99 **Results**

### 100 **M cluster formation during SARS-CoV-2 assembly correlates with changes of F-** 101 **actin nanostructures and cell morphology**

102 To investigate the kinetics of SARS-CoV-2 assembly, we monitored viral M clusters  
103 formation at different time points upon SARS-CoV-2 infection (6 to 77 h post-infection,  
104 pi) of human pulmonary A549-hACE2 cells by immunofluorescence confocal microscopy  
105 using an anti-COV-2 membrane protein ( $\alpha$ M) antibody (Fig. 1A-B, Supplementary Fig.  
106 1A-B and 2). Indeed, human pulmonary A549-hACE2 cells were highly susceptible to  
107 SARS-CoV-2 infection (Supplementary Fig. 1 and 2). Further, size quantification of the  
108 intracellular M clusters per cell at different time points pi (Fig. 1C, left, and  
109 Supplementary Fig. 1B) showed an increase of intracellular M cluster size from a mean of  
110  $0.6 \mu\text{m}^2$  (interquartile range, IQR  $0.1 - 3 \mu\text{m}^2$ ) at 24h pi to a median of  $1.46 \mu\text{m}^2$   
111 (IQR= $0.4-15 \mu\text{m}^2$ ) at 48h pi. Interestingly, the size of intracellular M clusters per cell  
112 significantly decreased after 48h pi to  $0.77 \mu\text{m}^2$  (IQR= $0.1-9 \mu\text{m}^2$ ) at 54h pi,  $0.72 \mu\text{m}^2$   
113 (IQR= $0.1-8 \mu\text{m}^2$ ) at 72h pi and  $0.64 \mu\text{m}^2$  (IQR= $0.1-7 \mu\text{m}^2$ ) at 77h pi. Remarkably, the  
114 maximal area occupied by intracellular M clusters per cell was  $15 \mu\text{m}^2$  at 48h pi, whereas  
115 it ranged between 3 and  $9 \mu\text{m}^2$  at the other time points analysed. Quantification of the  
116 total intensity of viral M clusters per cell (Figure 1C, right) showed also a significant peak  
117 at 48h pi (Mean= $8.06 \times 10^7$ ) when compared to the other time points analysed. Supporting  
118 these results, RNA-sequencing (RNA-seq) based expression analysis in SARS-CoV-2-  
119 infected A549-hACE2 cells showed significant increase of all viral transcripts from 24h pi  
120 to 48h pi (Supplementary Fig. 1C), suggesting an increase of unsliced viral genomic RNA  
121 during SARS-CoV-2 assembly. Interestingly, we detected intracellular increase of the  
122 viral structural proteins N, M and S from 24h pi to 72h pi (Supplementary Fig. 1D), as  
123 well as a peak of viral particle release in the cell culture medium at 72h pi (Fig. 1D and  
124 Supplementary Fig. 1E). Our results support that during the kinetic of SARS-CoV-2  
125 infection of human pulmonary cells, intracellular SARS-CoV-2 assembly peaks at 48h pi,  
126 whereas the release of SARS-CoV-2 particles peaks at 72h pi.

127 We also monitored the effect of SARS-CoV-2 infection on the cytoskeleton of A549-  
128 hACE2 cells by confocal microscopy at different time points pi after labelling F-actin by  
129 phalloidin stain (Figure 1E and Supplementary Fig. 2). We observed changes in the  
130 distribution of F-actin in A549-hACE2 cells at different time points SARS-CoV-2 pi. *E.g.*,  
131 F-actin stress fibers were visible in non-infected control cells and disappeared 24h pi,  
132 whereas other F-actin structures, such as elongated filopodia, appeared 24h pi. Further,  
133 quantification of F-actin intensity implementing Z-stack projection images (Fig. 1F)  
134 revealed significant increase of F-actin intensity from 999 a.u. at 0h pi to 1572 a.u. at 24h  
135 pi and 1857 a.u. at 48h pi, whereas F-actin intensity decreased to 1184 a.u. at 72h pi.  
136 Interestingly, we did not detect significant changes in the total actin content of the cell by  
137 western blot analysis (WB) of proteins extracts (Figure 1G). Our results indicate that  
138 SARS-CoV-2 infection induced extensive reorganization of intracellular actin fibers  
139 without significantly affecting total actin levels.

140 Further analysis of the morphological changes that we observed in A549-hACE2 cells  
141 upon SARS-CoV-2 infection (Fig. 2A-B, Supplementary Movies 1 and 2) revealed

142 significant increase of cell height from 2.96  $\mu\text{m}$  (IQR=2.2 -3.9  $\mu\text{m}$  ) at 0h pi to 3.75  $\mu\text{m}$   
143 (IQR=2.2-4.72  $\mu\text{m}$ ) at 24h pi and 4.89  $\mu\text{m}$  (IQR= 3.4-6  $\mu\text{m}$  ) at 48h pi, whereas cell height  
144 decreased to 3.29  $\mu\text{m}$  (IQR=2.4-4.8  $\mu\text{m}$ ) at 72h pi. In contrast to cell height, cell surface  
145 and cell volume showed the opposite effects upon SARS-CoV-2 infection with decreases  
146 values above 24h pi (Fig. 2C-D), suggesting a contraction of the A549-hACE2 cells at this  
147 time point. Summarizing, our results indicate that the kinetics of M cluster formation  
148 during SARS-CoV-2 particle assembly and release correlate with rearrangements of  
149 intracellular F-actin fibers and morphological changes of SARS-CoV-2-infected human  
150 pulmonary A549-hACE2 cells.

### 151 **Reorganization of F-actin nanostructures in SARS-CoV-2 infected pulmonary cells**

152 Since we detected a maximum of M cluster formation during SARS-CoV-2 assembly at  
153 48h pi, we focused our further analysis on this specific time point and optimized  
154 experimental conditions to achieve a higher resolution for imaging of F-actin structures  
155 using super-resolution 2D STED microscopy in non-infected and SARS-CoV-2 infected  
156 A549-hACE2 cells (Figure 3A), thereby increasing resolution below 70nm by 10 times as  
157 compared to confocal microscopy and being able to observe dual colour structures. To  
158 quantify F-actin rearrangements, we have analyzed the orientation angle of actin fibers  
159 from STED images (as in 18). We clearly observed the parallel orientation of actin stress  
160 fibers in non-infected cells, whereas actin stress fibers were not visible in SARS-CoV-2  
161 infected cells at 48h pi (Fig. 3A). The color map of F-actin orientation and data for  
162 distribution of orientation angle, suggested a significant rearrangement of F-actin network  
163 with protrusion of filaments at the cell plasma membrane (Fig. 3A-B). The major possible  
164 orientation angle of F-actin fibers in non-infected cells was significantly lower (around 90  
165 and -90 degree) than in SARS-CoV-2 infected cells at 48h pi (Figure 2 B). We also  
166 detected an increase in the random orientation angle after infection, probably due to F-  
167 actin rearrangement, distortion or reorganization. To investigate the potential formation of  
168 intracellular self-organizing F-actin structures in SARS-CoV-2 infected A549-hACE2  
169 cells, we monitored the organization of the F-actin cytoskeleton at 48h pi using super-  
170 resolution 2D microscopy and detected in the infected cells F-actin structures resembling  
171 intracellular “actin rings” (Fig. 3C). The diameter of the observed “actin rings” ranged  
172 between 0.5 and 2.5  $\mu\text{m}$  with a mean of 1.03  $\mu\text{m}$  and a standard deviation (STD) of 0.35  
173  $\mu\text{m}$  (Fig. 3D, top). However, detection of viral M clusters around intracellular “actin  
174 rings” by 2D STED microscopy was limited by signal saturation in Z direction. To bypass  
175 these limitations, super-resolution 3D STED microscopy with 185 nm slice in Z direction  
176 was implemented (Fig. 3E) and surprisingly revealed that viral M clusters formed similar  
177 “ring-like” structures in close proximity to the “actin rings”. Transmission electron  
178 microscopy (TEM) slices of the infected cells also show vesicular structures, of 0.6 to 1  
179  $\mu\text{m}$  size, full of viruses with particle budding events at the cell membranes (Fig.3E, TEM).  
180 By STED 3D, the diameter of the “viral rings” ranged between 0.5 and 2  $\mu\text{m}$  with a mean  
181 of 0.95  $\mu\text{m}$  and a STD of 0.27  $\mu\text{m}$  (Fig. 3D, bottom). By superposing both F-actin and  
182 virus STED images, it appears that M labelled intracellular organelles (“viral rings”) are  
183 surrounded by F-actin nanostructures (“actin rings”) (Fig. 3E). Our results allow the  
184 hypothesis of a spatial and functional interplay between F-actin nanostructures and M  
185 cluster formation during assembly of SARS-CoV-2 particles, suggesting a stabilization of  
186 the viral assembly platforms by F-actin or the need of F-actin for the transport of virus  
187 loaded vesicles towards the cell plasma membrane.



## **SARS-CoV-2 infection induced actin filament rearrangement forming virus loaded protrusions**

Production of SARS-CoV-2 particles is a multistep process that occurs in different compartments of an infected cell and culminates in the assembly of virus components at the plasma membrane followed by budding and release of infectious virus particles. To investigate the role of F-actin during virus particle formation and release, we used super-resolution 2D STED microscopy for quantitative analysis (Fig. 4A-C). The number of filopodia-like structures significantly increased from 2 per 10  $\mu\text{m}$  of infected cell plasma membrane (IQR=1-3) in non-infected A549-hACE2 cells to 10 per 10  $\mu\text{m}$  of infected cell plasma membrane (IQR=6-18) in SARS-CoV-2-infected cells 48h pi (Fig. 4B). We also detected a significant increase in the maximum length of filopodia-like structures from 2-4  $\mu\text{m}$  in non-infected cells to 10-12  $\mu\text{m}$  in SARS-CoV-2-infected cells 48h pi (Fig. 4C). Interestingly, we observed these structures being loaded with viruses. A quantitative analysis of the viral M clusters and individuals particles using 2D/3D STED images revealed three different population of viral M clusters in 3 different cellular regions: intracellular (see Fig. 3 D, E), particle release sites at the cell plasma membrane (Fig.4D, zone 1) and viral particles at the filopodia of infected cells (Fig. 4D, zone 2). The size of viral particles ranged in zone 2 from 70 nm to 350 nm with a mean of 209 nm and a STD of 87 nm (Fig. 4D), in zone 1 from 150 nm to 1000 nm (Mean=478 nm; STD=216 nm; Fig. 4D). These quantitative analyses suggested that viral particles are released in package at the cell membrane and then particles migrate (possibly one or two together) on filopodia-like structures. Strikingly, in some infected cells at close proximity, we also observed an inter-connection between cells via filopodia-like structures loaded with viruses, suggesting that virus-containing filopodia could be one of the possible mechanisms for cell-to-cell SARS-CoV-2 infection spread (Fig. 4D).

## **SARS-CoV-2 infection enhances expression of actin cytoskeleton regulating genes**

Our results suggest that F-actin rearrangements during viral particle assembly are important for viral replication during SARS-CoV-2 infection progression. To gain further insights, we performed a RNA-seq-based transcriptome analysis in non-infected and SARS-CoV-2 infected A549-hACE2 cells at 48h pi (Fig. 5A and Supplementary Fig. 3A). We detected increased levels after infection in 9.91% of the transcripts mapped to the human genome (4376 transcripts with  $\text{FC} \geq 2$ ), whereas the levels of 7.10% of the transcripts mapped to the human genome were reduced (3136 transcripts with  $\text{FC} \leq 0.3$ ). Gene set enrichment analysis (GSEA) based on Reactome [23] from the top 9.91% of the genes with increased levels 48h pi (4376transcripts; Fig. 5B) revealed significant enrichment of genes related to RHO GTPases activate PKNs ( $P= 0.368$ ) as the top item of the ranked list. In addition, graphical representation of the enrichment profile (Fig. 5C) showed a high enrichment score (ES) of 0.559 for RHO GTPases activate PKNs. Since RHO GTPases are best known for their roles in regulating cytoskeletal rearrangements, we monitored the transcript levels of various proteins related to the cytoskeleton (Fig. 5D) and detected increased transcript levels of proteins that are known to be regulated by RHO GTPases, thereby being Alpha-actinin superfamily, and in particular Alpha-Actinins 2 and 3 (ACTN2, ACTN3), the ones with the most prominent increase. Type II myosins are also reported (MHY7 and MHY6), suggesting together with ACTN2 and ACTN3 a possible contractile activity of the infected cells (24), as previously suggested by our cell morphology analysis (Fig. 2). In addition, 2D STED microscopy images and actin orientation analysis (Fig. 3A) revealed the formation of large actin fibers near the cell

235 plasma membrane. Furthermore, WB of protein extracts showed a 2-fold increase of  
236 alpha-actinins (ACTN) in SARS-CoV-2 infected cells 48h pi when compared to non-  
237 infected cells (Fig. 5E).

### 238 **PKN inhibitor reduced SARS-CoV-2 replication in human pulmonary cells**

239 Following the line of ideas from our previous results (Fig. 5, 2 and 3), we investigated the  
240 effect of the 2 inhibitors Rho/SFR and PKN inhibitors on SARS-CoV-2 replication, since  
241 they regulate actin fibers formation and alpha-actinins regulation, respectively. Data  
242 reveals a reduction of SARS-CoV-2 replication in human pulmonary cells overtime and in  
243 a dose-dependent manner with an IC<sub>50</sub> of 1.36  $\mu$ M and 0.65  $\mu$ M for Rho/SFR and PKN  
244 inhibitors, respectively (Fig. 6A, Supplementary Fig. 4). The LD<sub>50</sub> being determined as  
245 7.02  $\mu$ M for Rho/SFR inhibitor and 37.7  $\mu$ M for PKN inhibitor, indicating a selectivity  
246 index > 10, thereby supporting that these are potent antiviral inhibitors for the  
247 development of therapeutic strategies against SARS-CoV-2. Moreover, confocal  
248 immunofluorescence images of human pulmonary A549-hACE2 cells infected with  
249 SARS-CoV-2 in the presence of 0.5 $\mu$ M PKN inhibitor showed a restoration of cell  
250 morphology and of F-actin structural pattern (Fig. 6B). Strikingly, PKN inhibitor  
251 treatment of SARS-CoV-2-infected pulmonary cells reduced the size of intracellular viral  
252 M clusters (Fig. 6C) and decreased the levels of viral particle release (Fig. 6D). We used  
253 for these experiments remdesivir (IC<sub>50</sub> equal 1  $\mu$ M) as positive control [25], since it is an  
254 antiviral drug that targets the virus replication complex reducing the number and size of  
255 viral assembly M clusters (Fig. 6C) and decreasing the levels of viral particle release (Fig.  
256 6D). Interestingly, PKN inhibition blocked M clusters in the ER (Supplementary Fig. 5),  
257 thus probably at the level of virus assembly or virus egress from the ER, as shown by  
258 immunofluorescence staining for M and grp78 ER marker (Supplementary Fig. 5) and  
259 suggesting a role for the alpha-actinins superfamily proteins in SARS-CoV-2 assembly  
260 and particle egress.

## 261 **Discussion**

262 SARS-CoV-2 is a recently discovered virus. Despite the fact that it is in the spotlight of  
263 the scientific community worldwide for being the main cause of the COVID-19 pandemic,  
264 the role of the cytoskeleton during SARS-CoV-2 replication has remained elusive. Here,  
265 we implemented confocal and super-resolution 2D and 3D STED microscopy to analyse  
266 the correlation between that host cell F-actin content and the kinetic of SARS-CoV-2  
267 infection in human pulmonary cells: intracellular SARS-CoV-2 assembly and F-actin  
268 content peak at 48h pi, accompanied with a cell morphology deformation and SARS-CoV-  
269 2 particle release peaking at 72h pi. The RNA-seq-based analysis of viral transcripts in  
270 these infected human pulmonary cells (Supplementary Fig. 1C) correlated with the peak of  
271 SARS-CoV-2 assembly at 48h pi. The apparent discrepancies between our SARS-CoV-2  
272 transcriptome and the recently published SARS-CoV-2 transcriptome (26) could be  
273 explained by differences in the experimental design, such as the implementation of  
274 different cell lines (Calu-3, Caco-2 and Vero cells versus A549-hACE2) and higher viral  
275 titers (MOI 1 and 0.1 versus 0.01), among others. The higher susceptibility to SARS-  
276 CoV-2 infection of the here implemented human pulmonary A549-hACE2 cells allowed  
277 us to use lower viral titers during our RNA-seq experiment (MOI 0.01). More relevant  
278 from the present study, the observed kinetics of M cluster formation during SARS-CoV-2  
279 particle assembly and release correlated with rearrangements of cytoskeletal F-actin  
280 nanostructures and morphological changes of SARS-CoV-2-infected A549-hACE2 cells.  
281 Our results agree with previous reports demonstrating that actin rearrangements are

282 involved during the replication of various viruses targeting the respiratory tract, including  
283 the respiratory syncytial virus (RSV) and influenza virus [27,28,29,30]. Further, the strong  
284 cytopathic effect observed after SARS-CoV-2 infection could be related with the dramatic  
285 changes in F-actin nanostructures and cell morphology. However, the expression of  
286 caspases as apoptosis markers were reduced in SARS-CoV-2 infected cells at 48h pi,  
287 supporting the viability of the cells analyzed here (Supplementary Fig. 3). It is well known  
288 that actin polymerization has a role in replication of influenza viruses (31). For RSV, actin  
289 was not completely proven to be involved in assembly, rather actin was playing a role in  
290 virus spread driven filopodia induction through Arp2/3 complexes [28]. In our study,  
291 increase in F-actin content during infection, with a global actin content remaining quite  
292 constant (Figure 1 G), included a redistribution of F-actin polymerization into new  
293 nanostructures that appears quite crucial for the late phases of viral replication.  
294 Remarkably, we found that SARS-CoV-2 infection induces ring-like F-actin  
295 nanostructures surrounding also ring-like viral M-containing structures, suggesting the  
296 formation of large intracellular viral organelles, in which SARS-CoV-2 particle assembly  
297 take place. This interpretation of our results is in agreement with earlier discoveries,  
298 showing that large intracellular structures at the ERGIC containing SARS-CoV-2  
299 structural proteins (M, N, E and S proteins) together with viral genomic RNA and driving  
300 the assembly of new viral particles (7,8). Strikingly, we also found that SARS-CoV-2  
301 infection promote filopodia-like structures loaded with viruses to neighbour cells,  
302 suggesting these structures as mechanism for cell-to-cell SARS-CoV-2 infection spread.  
303 Consistent with these findings, viral cell-to-cell transmission has been reported for other  
304 RNA enveloped viruses, such as the human immunodeficiency virus 1 (HIV-1) (32).  
305 Summarizing, all these results support a spatial and functional interplay between F-actin  
306 nanostructures and M cluster formation during assembly of SARS-CoV-2 particles, which  
307 needs to be further investigated.

308 Actin polymerization starts with the formation of a small aggregate consisting of three  
309 actin monomers. Actin filaments are then able to grow by the reversible addition of  
310 monomers to both ends. However, one end (the plus end) growth up to ten times faster  
311 than the minus end. The polymerisation of actin and the reorganization of actin filaments  
312 are complex processes regulated by different factors. One of these factors is the protein  
313 kinase N (PKN), which is a fatty acid-activated serine/threonine kinase, whose catalytic  
314 domain exhibits homology with that of the protein kinase C family. It has been reported  
315 that the interaction of PKN with alpha-actinins is promoted by phosphatidylinositol 4,5-  
316 bisphosphate (33), suggesting that PKN/alpha-actinin complexes locate at the cell plasma  
317 membrane to promote cortical actin fiber rearrangement (34). Alpha-actinins belong to the  
318 spectrin gene superfamily which represents a diverse group of cytoskeletal proteins.  
319 Alpha-actinins are F-actin-crosslinking proteins found in various subcellular localizations  
320 both in muscle and non-muscle cells (35), and being involved in diverse cellular  
321 processes. Besides the involvement of alpha-actinins regulating cortical actin dynamics  
322 during HIV-1 entry (36), the role of alpha-actinins during replication of virus has  
323 remained largely unknown. Here, we showed that SARS-CoV-2 infection increased levels  
324 of *ACTN2* and *ACTN3* transcripts of ACTN proteins. Furthermore, interfering with alpha-  
325 actinins function through PKN inhibitor treatment in SARS-CoV-2 infected cells restored  
326 F-actin structures and reduced SARS-CoV-2 replication. Overall, our results reveal that F-  
327 actin nanostructures and F-actin rearrangement are required for SARS-CoV-2 replication  
328 in pulmonary host cells and support the idea of using PKN inhibitors for the development  
329 of therapeutic approaches against SARS-CoV-2 infection.

## 330 **Materials and Methods**

### Cell culture and infection

Human pulmonary Alveolar A549-hACE2 cells were obtained from original A549 (ECACC) transduced with a lentiviral vector expressing human ACE2 receptor (manufactured by FlashTherapeutics company, Toulouse, France) and sorted by cytometry for having more than 80% hACE2 on their surface. The sorted A549-hACE2 cells were maintained in RPMI supplemented with 10% heat inactivated fetal bovine serum (FBS), 1% sodium Pyruvate, 0.5% HEPES and antibiotics (penicillin/Streptavidin) and cultivated at 37°C with 5% CO<sub>2</sub>. For virus production, VeroE6 cells were obtained from (ECACC) and maintained in Dulbecco's minimal essential medium (DMEM) supplemented with 10% heat inactivated fetal bovine serum (FBS) at 37°C with 5% CO<sub>2</sub>.

The strain BetaCoV/France/IDF0372/2020, was supplied by the National Reference Center for Respiratory Viruses hosted by Institut Pasteur (Paris, France) and headed by Pr. Sylvie van der Werf. The human sample from which strain BetaCoV/France/IDF0372/2020 was isolated has been provided by Dr. X. Lescure and Pr. Y. Yazdanpanah from the Bichat Hospital, Paris, France. Moreover, the BetaCoV/France/IDF0372/2020 strain was supplied through the European Virus Archive goes Global (EVAg) platform, a project that has received funding from the European Union's Horizon 2020 research and innovation program under the grant agreement No 653316. COV-2 Virus was propagated in VeroE6 cells with DMEM containing 2.5% FBS at 37°C with 5% CO<sub>2</sub> and harvested 72 hours post inoculation. Virus stocks were stored at -80°C and titer using plaque assays as previously described (11).

### Quantitative reverse transcription polymerase chain reaction (qRT-PCR)

RNAs from mock infected or infected (MOI=0.01) A549-hACE2 cell culture supernatant were extracted using the Nucleospin Dx Virus RNA purification kit (Macherey-Nagel). Then qRT-PCR was performed in triplicate as described<sup>20</sup>, using primers targeting the E gene of SARS-CoV-2 (E\_Sarbeco-Forward ACAGGTACGTTAATAGTTAATAGCGT; E\_Sarbeco-Reverse ATATTGCAGCAGTACGCACACA) and Luna Universal One-Step qRT-PCR Kit (New England Biolabs) on a Roche Light Cycler 480. The calibration of the assay was performed with a nCoV-E-Sarbeco-Control Plasmid (Eurofins Genomics).

### RNA sequencing and data analysis.

RNA was sequenced as previously described [PMID 31110176; 29867223]. Briefly, total RNA from non-infected (Ctrl) or SARS-CoV-2 infected A549-hACE2 and hPCLS was isolated using Trizol (Invitrogen). RNA was treated with DNase (DNase-Free DNase Set, Qiagen) and repurified using the miRNeasy micro plus Kit (Qiagen). Total RNA and library integrity were verified on LabChip Gx Touch 24 (Perkin Elmer). One µg of total RNA was used as input for SMARTer Stranded Total RNA Sample Prep Kit-HI Mammalian (Clontech). Sequencing was performed on the NextSeq500 instrument (Illumina) using v2 chemistry with 1x75bp single end setup. Raw reads were visualized by FastQC to determine the quality of the sequencing. Trimming was performed using trimmomatic with the following parameters LEADING:3 TRAILING:3 SLIDINGWINDOW:4:15 HEADCROP:4, MINLEN:4. High quality reads were mapped using with HISAT2 v2.1.0 with reads corresponding to the transcript with default parameters. RNA-seq reads were mapped to human genome hg19. After mapping, Tag libraries were obtained with MakeTaglibrary from HOMER (default setting). Samples were quantified by using analyzeRepeats.pl with the parameters (hg19 -count genes - rpkm; reads per kilobase per millions mapped).



381  
382  
383  
384  
385  
386  
387  
388  
389  
390  
391  
392  
393  
394  
395  
396  
397  
398  
399  
400  
401  
402  
403  
404  
405  
406  
407  
408  
409  
410  
411  
412  
413  
414  
415  
416  
417  
418  
419  
420  
421  
422  
423  
424  
425  
426  
427  
428  
429  
430

### **RNA-seq based expression analysis of viral transcripts.**

Fastq files from infected A549-hACE2 cells after 24h, and 48h were used as input; for each timepoint we used 2 replicates. Read trimming was performed using trimmomatic (v 0.39) with the following parameters “ILLUMINACLIP:all\_adapters\_v0.38.fa:2:30:10 AVGQUAL:30 LEADING:0 TRAILING:0 SLIDINGWINDOW:6:30 MINLEN:38”. Trimmed reads were then aligned to the SARS-CoV-2 reference genome NC\_045512.2.fasta (downloaded May 2021 from [https://www.ncbi.nlm.nih.gov/nucleotide/NC\\_045512](https://www.ncbi.nlm.nih.gov/nucleotide/NC_045512)) using the STAR (v 2.7.9a) aligner; STAR parameters were the following “--outFilterType BySJout --outFilterMultimapNmax 20 --alignSJoverhangMin 8 --outSJfilterOverhangMin 12 12 12 12 --outSJfilterCountUniqueMin 1 1 1 1 --outSJfilterCountTotalMin 1 1 1 1 --outSJfilterDistToOtherSJmin 0 0 0 0 --outFilterMismatchNmax 999 --outFilterMismatchNoverReadLmax 0.04 --scoreGapNoncan -4 --scoreGapATAC -4 --chimOutType WithinBAM HardClip --chimScoreJunctionNonGTAG 0 --alignIntronMin 20 --alignIntronMax 1000000 --alignMatesGapMax 1000000 --alignSJstitchMismatchNmax -1 -1 -1 -1”. Samtools (v 1.12) was used to handle the alignments, and bedtools coverage was used to count reads in each viral feature (gene) using the genomic coordinates from GCF\_009858895.2\_ASM985889v3\_genomic.gff (downloaded May 2021 from [https://ftp.ncbi.nlm.nih.gov/genomes/all/GCF/009/858/895/GCF\\_009858895.2\\_ASM985889v3/GCF\\_009858895.2\\_ASM985889v3\\_genomic.gff.gz](https://ftp.ncbi.nlm.nih.gov/genomes/all/GCF/009/858/895/GCF_009858895.2_ASM985889v3/GCF_009858895.2_ASM985889v3_genomic.gff.gz)) only for protein coding features. Feature counts were transformed to reads per kilobase million (RPKM) we calculated mean RPKM from the duplicates for each feature and then calculated a Fold Change as mean RPKM at 48h / mean RPKM at 24h; this data handling and plotting was performed using R.

### **Western Blot analysis**

A549-hACE2 cells were infected for 2 hours with SARS-CoV-2 (MOI = 0.01). At different time point (6h, 24h, 48h, 54h, 72h and 77h) post infection (pi), cells were washed twice in PBS, detached with Versen (0.1M EDTA), pelleted at 250g for 6min and lysed in RIPA buffer for western blot analysis. Total protein concentration was calculated using a Bradford protein assay kit (ThermoFisher). 20µg of total cell lysates were diluted in Laemmli buffer and proteins were separated by SDS-PAGE on 8% (for COV-2 S- and N proteins) and 12% (for COV-2 M protein) acrylamide gels. Gels were transferred to PVDF membrane using wet transfer with Tris-glycine-methanol buffer. Membranes were washed in TBS, blocked with 5% milk in TBS-Tween 0.1% for 30min and incubated overnight at 4°C with primary antibodies against the spike S protein (Gentex, cat# GTX632604), N-protein (Gentex, cat# GTX632269) or M-protein (Tebu, cat# 039100-401-A55), all three diluted at 1:1000 in TBS-T. After washing with 5% milk in TBS-Tween, the membranes were incubated with HRP conjugated anti-mouse antibodies for N and S protein, and with HRP conjugated anti-rabbit antibody for M protein and alpha-actinins for 2h at room temperature, then washed in TBS-Tween buffer, incubated with ECL reagent (Amersham cat#RPN2236) and imaged using a Chemidoc Imager (Biorad).

### **Immuno-fluorescence confocal and 2D/3D STED super-resolution microscopy**

A549-hACE2 cells seeded on glass coverslips were infected with SARS-CoV-2 at a MOI=0.1 or MOI=0.01 (low multiplicity of infection). At different time interval from 6h to 77h post-infection cells were washed with PBS and fixed in 4% paraformaldehyde in PBS for 15 minutes at room temperature, followed by permeabilization with 0.2% Triton

X-100 in PBS for 4-5 minutes and blocking in 2% BSA in PBS for 15 min. Incubation with primary antibodies anti-SARS-CoV2 rabbit membrane (M) protein (1:100) was performed for 2 hours at room temperature. After washing with PBS, cells were incubated with secondary antibodies AF568-labeled goat-anti-rabbit (1:200) and Star orange for high resolution STED imaging (1:100) as well as AF488-labeled Phalloidin and Star red phalloidin (1:100) (for high resolution STED microscopy) for 2 hours at room temperature. We have used mounting media prolong gold antifade reagent with DAPI and prolong gold antifade reagent without DAPI for confocal and STED microscopy respectively. Confocal fluorescence images were generated using a LSM800 confocal laser-scanning microscope (Zeiss) equipped with a 63X, 1.4 NA oil objective and STED 2D and 3D measurements were performed on the Abberior Instrument Expert Line STED super-resolution microscope (Abberior Instruments GmbH, Göttingen, Germany) using Star orange 580 and Star red pulsed excitation laser sources with a pulsed STED laser operating at 775 nm. For STED 2D (25% laser) lateral resolution was 67nm and for STED 3D (30% laser) resolution was 185nm in Z. All the images processed with ImageJ/Fiji. For 3D-reconstruction of confocal images, cells were fixed and stained as indicated and imaged as z stack with 0.3  $\mu\text{m}$  sections. Z stack was processed using ImageJ/Fiji, Imaris viewer.

### Electron Microscopy

A549-hACE2 pulmonary cells infected with SARS-CoV-2 were fixed with 2,5% (v/v) glutaraldehyde in PHEM buffer and post fixed in osmium tetroxide 1% /  $\text{K}_4\text{Fe}(\text{CN})_6$  0,8%, at room temperature for 1h for each treatment. The samples were then dehydrated in successive ethanol bathes (50/70/90/100%) and infiltrated with propylene oxide/EMbed812 mixes before embedding. 70 nm ultrathin cuts were made on a PTLX ultramicrotome (RMC,France), stained with OTE/lead citrate and observed on a Tecnai G2 F20 (200kV, FEG) TEM at the Electron Microscopy Facility COMET, INM, Platform Montpellier RIO Imaging, Biocampus, Montpellier.

### Statistical analysis

Statistical tests were performed using Origin 2021 software. Statistically significant analysis was evaluated using one-way ANOVA tests.  $**p < 0.05$ . Cell area and cell volume and height were calculated using 3D viewer plugin from Fiji image J. The orientation angle properties of a given region of interest in an image were computed based on the evaluation of the structure tensor in a local neighborhood using the Java plug-in for ImageJ/Fiji (<http://imagej.nih.gov/>) 'OrientationJ'. The Materials and Methods section should provide sufficient information to allow replication of the results. Begin with a section titled Experimental Design describing the objectives and design of the study as well as prespecified components.

### References

1. World Health Organization, World Health Organization. WHO Coronavirus Disease (COVID-19) Dashboard. World Health Organization. 2020. WHO Coronavirus Disease (COVID-19) Dashboard. *World Health Organization* (2020).
2. M. Z. Tay, C. M. Poh, L. Rénia, P. A. MacAry, L. F. P. Ng, The trinity of COVID-19: immunity, inflammation and intervention. *Nature Reviews Immunology*. **20** (2020), , doi:10.1038/s41577-020-0311-8.

- 478 3. Z. Wen, Y. Zhang, Z. Lin, K. Shi, Y. Jiu, Cytoskeleton - A crucial key in host cell for  
479 coronavirus infection. *Journal of Molecular Cell Biology*. **12** (2020), ,  
480 doi:10.1093/jmcb/mjaa042.
- 481 4. Y. Liu, Y. Yang, C. Zhang, F. Huang, F. Wang, J. Yuan, Z. Wang, J. Li, J. Li, C. Feng, Z.  
482 Zhang, L. Wang, L. Peng, L. Chen, Y. Qin, D. Zhao, S. Tan, L. Yin, J. Xu, C. Zhou, C. Jiang, L.  
483 Liu, Clinical and biochemical indexes from 2019-nCoV infected patients linked to viral loads  
484 and lung injury. *Science China Life Sciences*. **63** (2020), doi:10.1007/s11427-020-1643-8.
- 485 5. Y. Yang, L. Zhang, H. Geng, Y. Deng, B. Huang, Y. Guo, Z. Zhao, W. Tan, The structural and  
486 accessory proteins M, ORF 4a, ORF 4b, and ORF 5 of Middle East respiratory syndrome  
487 coronavirus (MERS-CoV) are potent interferon antagonists. *Protein and Cell*. **4** (2013),  
488 doi:10.1007/s13238-013-3096-8.
- 489 6. D. Bracquemond, D. Muriaux, Betacoronavirus Assembly: Clues and Perspectives for  
490 Elucidating SARS-CoV-2 Particle Formation and Egress. *mBio* (2021), doi:10.1128/mbio.02371-  
491 21.
- 492 7. C. Liu, L. Mendonça, Y. Yang, Y. Gao, C. Shen, J. Liu, T. Ni, B. Ju, C. Liu, X. Tang, J. Wei, X.  
493 Ma, Y. Zhu, W. Liu, S. Xu, Y. Liu, J. Yuan, J. Wu, Z. Liu, Z. Zhang, L. Liu, P. Wang, P. Zhang,  
494 The Architecture of Inactivated SARS-CoV-2 with Postfusion Spikes Revealed by Cryo-EM and  
495 Cryo-ET. *Structure*. **28** (2020), doi:10.1016/j.str.2020.10.001.
- 496 8. Y. M. Bar-On, A. Flamholz, R. Phillips, R. Milo, Sars-cov-2 (Covid-19) by the numbers. *eLife*. **9**  
497 (2020), doi:10.7554/eLife.57309.
- 498 9. L. A. Caldas, F. A. Carneiro, L. M. Higa, F. L. Monteiro, G. P. da Silva, L. J. da Costa, E. L.  
499 Durigon, A. Tanuri, W. de Souza, Ultrastructural analysis of SARS-CoV-2 interactions with the  
500 host cell via high resolution scanning electron microscopy. *Scientific Reports*. **10** (2020),  
501 doi:10.1038/s41598-020-73162-5.
- 502 10. H. Yao, Y. Song, Y. Chen, N. Wu, J. Xu, C. Sun, J. Zhang, T. Weng, Z. Zhang, Z. Wu, L.  
503 Cheng, D. Shi, X. Lu, J. Lei, M. Crispin, Y. Shi, L. Li, S. Li, Molecular Architecture of the  
504 SARS-CoV-2 Virus. *Cell*. **183** (2020), doi:10.1016/j.cell.2020.09.018.
- 505 11. S. Lyonnais, M. Hénaut, A. Neyret, P. Merida, C. Cazevielle, N. Gros, C. Chable-Bessia, D.  
506 Muriaux, Atomic force microscopy analysis of native infectious and inactivated SARS-CoV-2  
507 virions. *Scientific Reports*. **11** (2021), doi:10.1038/s41598-021-91371-4.
- 508 12. C. le Clainche, M. F. Carlier, Regulation of actin assembly associated with protrusion and  
509 adhesion in cell migration. *Physiological Reviews*. **88** (2008), , doi:10.1152/physrev.00021.2007.
- 510 13. P. I. Gil, G. Albrieu-Llinás, E. C. Mlewski, M. Monetti, L. Fozzatti, C. Cuffini, J. Fernández  
511 Romero, P. Kunda, M. G. Paglini, Pixuna virus modifies host cell cytoskeleton to secure  
512 infection. *Scientific Reports*. **7** (2017), doi:10.1038/s41598-017-05983-w.
- 513 14. J. Zan, S. T. An, K. K. Mo, J. W. Zhou, J. Liu, H. L. Wang, Y. Yan, M. Liao, J. Y. Zhou, Rabies  
514 virus inactivates cofilin to facilitate viral budding and release. *Biochemical and Biophysical*  
515 *Research Communications*. **477** (2016), doi:10.1016/j.bbrc.2016.07.030.
- 516 15. L. Blanchoin, R. Boujemaa-Paterski, C. Sykes, J. Plastino, Actin dynamics, architecture, and  
517 mechanics in cell motility. *Physiological Reviews*. **94** (2014), doi:10.1152/physrev.00018.2013.
- 518 16. M. Nemethova, S. Auinger, J. V. Small, Building the actin cytoskeleton: Filopodia contribute to  
519 the construction of contractile bundles in the lamella. *Journal of Cell Biology*. **180** (2008),  
520 doi:10.1083/jcb.200709134.

- 521 17. X. Sun, G. R. Whittaker, Role of the actin cytoskeleton during influenza virus internalization into  
522 polarized epithelial cells. *Cellular Microbiology*. **9** (2007), doi:10.1111/j.1462-  
523 5822.2007.00900.x.
- 524 18. M. Fritzsche, D. Li, H. Colin-York, V. T. Chang, E. Moendarbary, J. H. Felce, E. Sezgin, G.  
525 Charras, E. Betzig, C. Eggeling, Self-organizing actin patterns shape membrane architecture but  
526 not cell mechanics. *Nature Communications*. **8** (2017), doi:10.1038/ncomms14347.
- 527 19. M. Bouhaddou, D. Memon, B. Meyer, K. M. White, V. v. Rezelj, M. Correa Marrero, B. J.  
528 Polacco, J. E. Melnyk, S. Ulferts, R. M. Kaake, J. Batra, A. L. Richards, E. Stevenson, D. E.  
529 Gordon, A. Rojc, K. Obernier, J. M. Fabius, M. Soucheray, L. Miorin, E. Moreno, C. Koh, Q. D.  
530 Tran, A. Hardy, R. Robinot, T. Vallet, B. E. Nilsson-Payant, C. Hernandez-Armenta, A.  
531 Dunham, S. Weigang, J. Knerr, M. Modak, D. Quintero, Y. Zhou, A. Dugourd, A. Valdeolivas,  
532 T. Patil, Q. Li, R. Hüttenhain, M. Cakir, M. Muralidharan, M. Kim, G. Jang, B. Tutuncuoglu, J.  
533 Hiatt, J. Z. Guo, J. Xu, S. Bouhaddou, C. J. P. Mathy, A. Gaulton, E. J. Manners, E. Félix, Y.  
534 Shi, M. Goff, J. K. Lim, T. McBride, M. C. O’Neal, Y. Cai, J. C. J. Chang, D. J. Broadhurst, S.  
535 Klippsten, E. de wit, A. R. Leach, T. Kortemme, B. Shoichet, M. Ott, J. Saez-Rodriguez, B. R.  
536 tenOever, R. D. Mullins, E. R. Fischer, G. Kochs, R. Grosse, A. García-Sastre, M. Vignuzzi, J.  
537 R. Johnson, K. M. Shokat, D. L. Swaney, P. Beltrao, N. J. Krogan, The Global Phosphorylation  
538 Landscape of SARS-CoV-2 Infection. *Cell*. **182** (2020), doi:10.1016/j.cell.2020.06.034.
- 539 20. M. Cortese, J. Y. Lee, B. Cerikan, C. J. Neufeldt, V. M. J. Oorschot, S. Köhrer, J. Hennies, N. L.  
540 Schieber, P. Ronchi, G. Mizzon, I. Romero-Brey, R. Santarella-Mellwig, M. Schorb, M.  
541 Boermel, K. Mocaer, M. S. Beckwith, R. M. Templin, V. Gross, C. Pape, C. Tischer, J. Frankish,  
542 N. K. Horvat, V. Laketa, M. Stanifer, S. Boulant, A. Ruggieri, L. Chatel-Chaix, Y. Schwab, R.  
543 Bartenschlager, Integrative Imaging Reveals SARS-CoV-2-Induced Reshaping of Subcellular  
544 Morphologies. *Cell Host and Microbe*. **28** (2020), doi:10.1016/j.chom.2020.11.003.
- 545 21. C. Favard, J. Chojnacki, P. Merida, N. Yandrapalli, J. Mak, C. Eggeling, D. Muriaux, HIV-1 Gag  
546 specifically restricts PI(4,5)P2 and cholesterol mobility in living cells creating a nanodomain  
547 platform for virus assembly. *Science Advances*. **5** (2019), doi:10.1126/sciadv.aaw8651.
- 548 22. M. Letko, A. Marzi, V. Munster, Functional assessment of cell entry and receptor usage for  
549 SARS-CoV-2 and other lineage B betacoronaviruses. *Nature Microbiology*. **5** (2020),  
550 doi:10.1038/s41564-020-0688-y.
- 551 23. A. Subramanian, P. Tamayo, V. K. Mootha, S. Mukherjee, B. L. Ebert, M. A. Gillette, A.  
552 Paulovich, S. L. Pomeroy, T. R. Golub, E. S. Lander, J. P. Mesirov, Gene set enrichment  
553 analysis: A knowledge-based approach for interpreting genome-wide expression profiles.  
554 *Proceedings of the National Academy of Sciences of the United States of America*. **102** (2005),  
555 doi:10.1073/pnas.0506580102.
- 556 24. R. Levayer, T. Lecuit, Biomechanical regulation of contractility: Spatial control and dynamics.  
557 *Trends in Cell Biology*. **22** (2012), , doi:10.1016/j.tcb.2011.10.001.
- 558 25. C.. Chable-Bessia, *et al.* Low selectivity index of ivermectin and macrocyclic lactones on SARS-  
559 CoV2 replication in vitro argues against their therapeutic use for COVID-19. *Covid*, **2** (2022),  
560 Doi:10.3390/covid2010005.
- 561 26. D. Kim, S. Kim, J. Park, H. R. Chang, J. Chang, J. Ahn, H. Park, J. Park, N. Son, G. Kang, J.  
562 Kim, K. Kim, M. S. Park, Y. K. Kim, D. Baek, A high-resolution temporal atlas of the SARS-  
563 CoV-2 translome and transcriptome. *Nature Communications*. **12** (2021), doi:10.1038/s41467-  
564 021-25361-5.
- 565 27. S. Shahriari, J. Gordon, R. Ghildyal, Host cytoskeleton in respiratory syncytial virus assembly  
566 and budding. *Virology Journal*. **13** (2016), , doi:10.1186/s12985-016-0618-z.



- 567 28. M. Mehedi, T. McCarty, S. E. Martin, C. le Nouën, E. Buehler, Y. C. Chen, M. Smelkinson, S.  
568 Ganesan, E. R. Fischer, L. G. Brock, B. Liang, S. Munir, P. L. Collins, U. J. Buchholz, Actin-  
569 Related Protein 2 (ARP2) and Virus-Induced Filopodia Facilitate Human Respiratory Syncytial  
570 Virus Spread. *PLoS Pathogens*. **12** (2016), doi:10.1371/journal.ppat.1006062.
- 571 29. G. L. Ada, B. T. Perry, M. Edney, Infectivity of influenza virus filaments [25]. *Nature*. **180**  
572 (1957), , doi:10.1038/1801134a0.
- 573 30. V. M. Mosley, R. W. G. Wyckoff, Electron micrography of the virus of influenza [2]. *Nature*.  
574 **157** (1946), , doi:10.1038/157263a0.
- 575 31. S. Bedi, A. Ono, Friend or foe: The role of the cytoskeleton in influenza a virus assembly.  
576 *Viruses*. **11** (2019), , doi:10.3390/v11010046.
- 577 32. L. Bracq, M. Xie, S. Benichou, J. Bouchet, Mechanisms for cell-to-cell transmission of HIV-1.  
578 *Frontiers in Immunology*. **9** (2018), , doi:10.3389/fimmu.2018.00260.
- 579 33. H. Mukai, M. Toshimori, H. Shibata, H. Takanaga, M. Kitagawa, M. Miyahara, M. Shimakawa,  
580 Y. Ono, Interaction of PKN with  $\alpha$ -actinin. *Journal of Biological Chemistry*. **272** (1997),  
581 doi:10.1074/jbc.272.8.4740.
- 582 34. T. S. Fraley, C. B. Pereira, T. C. Tran, C. Singleton, J. A. Greenwood, Phosphoinositide Binding  
583 Regulates  $\alpha$ -Actinin Dynamics. *Journal of Biological Chemistry*. **280** (2005),  
584 doi:10.1074/jbc.m500631200.
- 585 35. B. Sjöblom, A. Salmazo, K. Djinović-Carugo,  $\alpha$ -Actinin structure and regulation. *Cellular and*  
586 *Molecular Life Sciences*. **65** (2008), , doi:10.1007/s00018-008-8080-8.
- 587 36. W. Yin, W. Li, Q. Li, Y. Liu, J. Liu, M. Ren, Y. Ma, Z. Zhang, X. Zhang, Y. Wu, S. Jiang, X. E.  
588 Zhang, Z. Cui, Real-time imaging of individual virion-triggered cortical actin dynamics for  
589 human immunodeficiency virus entry into resting CD4 T cells. *Nanoscale*. **12** (2020),  
590 doi:10.1039/c9nr07359k.

591

## 592 **Acknowledgments**

593 We thank CEMIPAI UAR3725 service unit for initial advices on SARS-CoV-2 virus  
594 production and titration and Aymeric Neyret for the TEM image. The Microscopy STED  
595 was done at the Montpellier Imaging Center for Microscopy (MRI). We are very great full  
596 to Marie-Pierre Blanchard for initiation to STED microscopy and to Dr Frederic Eghaian  
597 from Abberior for the gift of STED compatible secondary antibodies.

598

599

## **Funding:**

500 Delphine Muriaux was funded by the “Centre National de la Recherche Scientifique”  
501 (CNRS, France), Montpellier University through a Montpellier University of Excellence  
502 (MUSE) support and by the French Agency for Research (ANR COVID19) grant  
503 “NucleoCoV-2”. J.Swain was funded by the Mediterranee foundation, Marseille, France.  
504 Guillermo Barreto was funded by the “Centre National de la Recherche Scientifique”  
505 (CNRS, France), “Délégation Centre-Est” (CNRS-DR6), the “Lorraine Université” (LU,  
506 France) through the initiative “Lorraine Université d’Excellence” (LUE) and the  
507 dispositive “Future Leader” and the “Deutsche Forschungsgemeinschaft” (DFG, Bonn,  
508 Germany) (BA 4036/4-1). Karla Rubio was funded by the “Consejo de Ciencia y  
509 Tecnología del Estado de Puebla” (CONCYTEP, Puebla, Mexico) through the initiative  
510 International Laboratory EPIGEN.

511

512 **Author contributions:** PM, DB performed cell culture, BSL3 infection, viral stock  
513 amplification and titer, viral RNA extraction and qRT-PCR, immunoblots. DB  
514 participated to the TEM. JS performed immunofluorescence sample preparation, confocal  
515 and STED 2D and 3D Microscopy and quantitative analysis. KR performed RNA  
516 extraction and sequencing. KR, IA, SG and GB performed RNA sequencing and analyzed  
517 RNA-seq data. DM, JS, GB and KR were involved in manuscript writing. JS, GB and DM  
518 conceptualized the study, edited the figures and wrote the manuscript. DM supervised the  
519 study. DM and GB raised funding for the study.

520 **Competing interests:** Authors declare that they have no competing interests.

521 **Data and materials availability:**

522 All data are available in the main text or the supplementary materials.  
523  
524  
525  
526  
527

528 **Figures and Tables**  
529

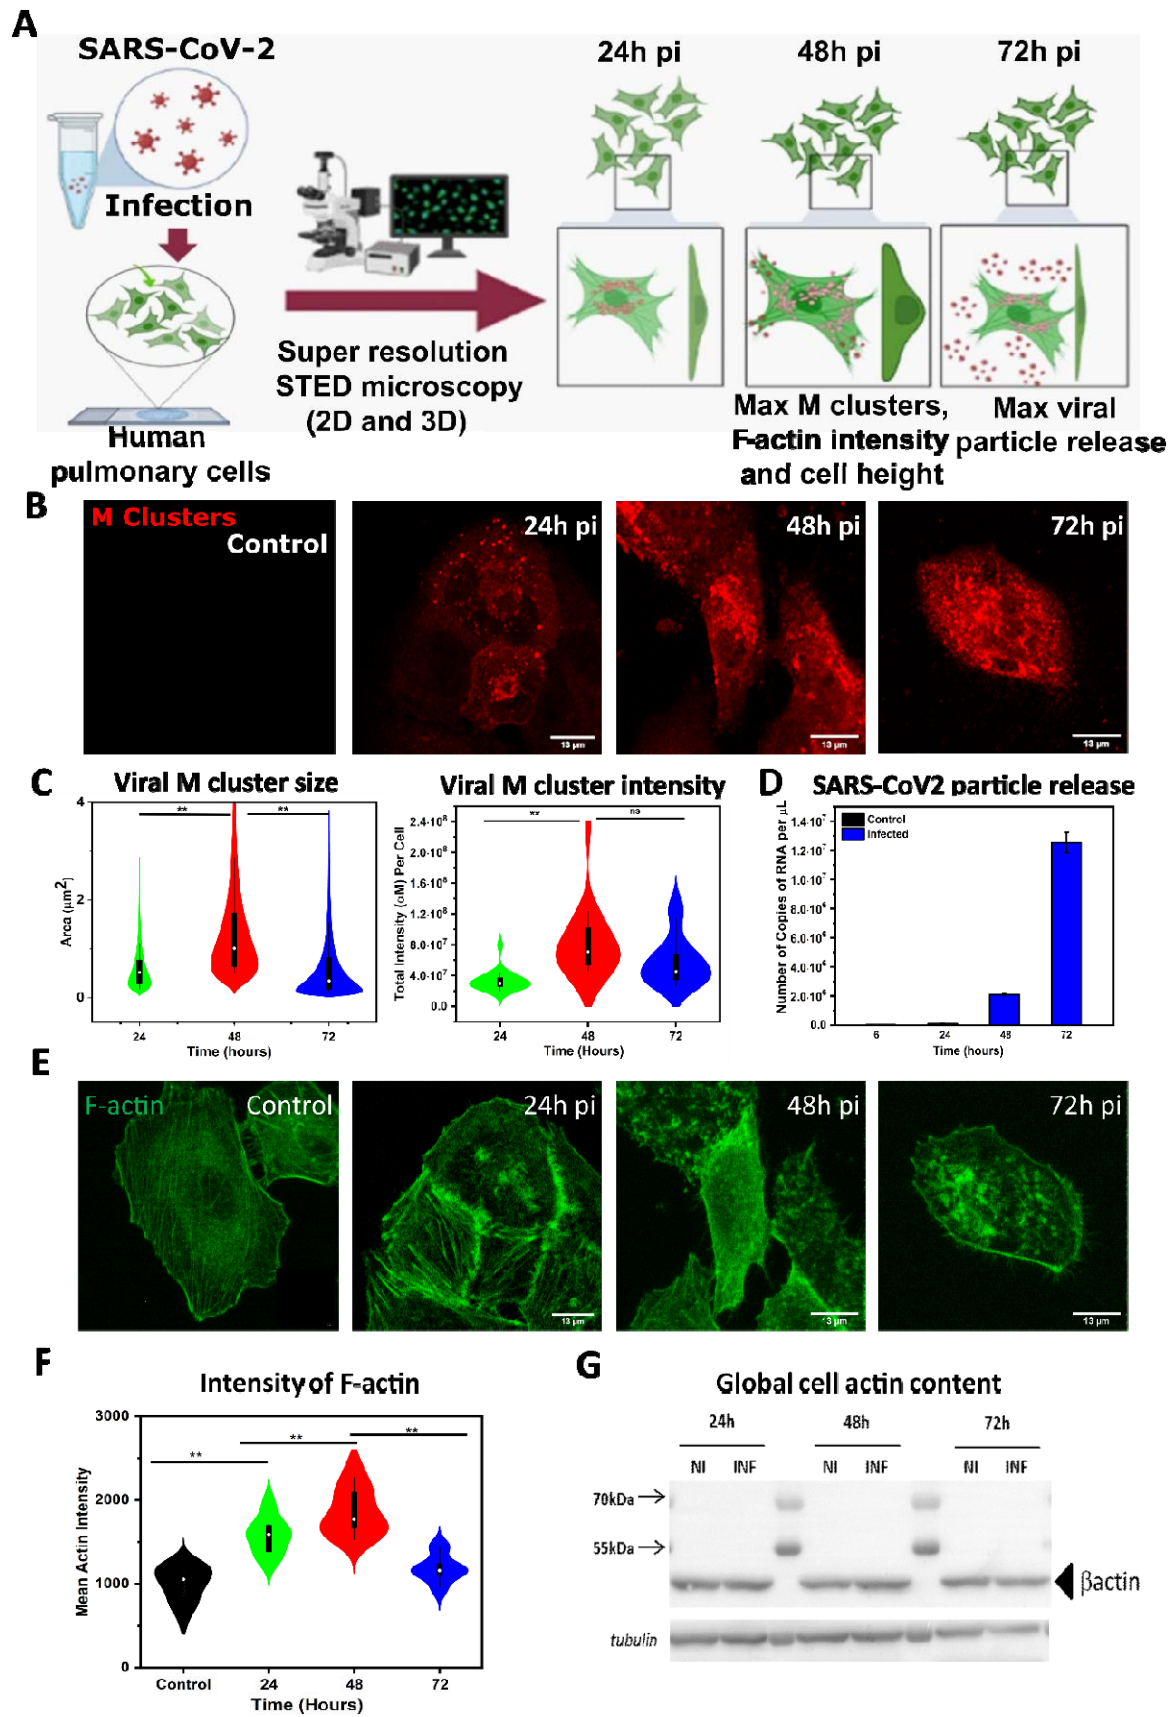

530

531

532

533 **Fig 1. Increase in F-actin content correlated with M clusters of human pulmonary cells upon**  
534 **SARS-CoV-2 infection**

535 Imaging and quantitative analysis of time course changes in viral M clusters area,  
536 morphology and mean F-actin intensity of SARS-CoV-2 infected A549-hACE2 cells.  
537 A549-hACE2 cells were fixed at 0h, 24h, 48h, and 72h post infection and processed for  
538 immunofluorescence. SARS membrane protein anti-M rabbit antibody and a secondary  
539 antibody Alexa Fluor 568 (in red) and for F-actin Phalloidin Alexa Fluor 488 were used  
540 for confocal microscopy. (A) Schematic representation and confocal images of viral  
541 clusters and F-actin with different time post infection 0h to 72h. (B) Images for changes in  
542 viral M clusters size at different time post infection. (C) Plot for viral M clusters size and  
543 viral M clusters intensity at different time post infection. (D) Plot for Number of copies of  
544 RNA/ $\mu$ L in the supernatant of infected cells with different time post infection. (E) Images  
545 for changes in F-actin intensity per cell at different time post infection. (F) Plot for mean  
546 F-actin intensity with or without infection at different time of post infection. (G) Western  
547 blot data for global actin content of non-infected and infected cell at different time point of  
548 infection. All F-actin intensity of infected and non-infected cells are calculated from Z-  
549 projection images. A number of  $20 < n < 50$  cells were analyzed from at least 3  
550 independent experiments. Statistical significant analysis were evaluated using one-way  
551 ANOVA tests.  $**p < 0.05$ .



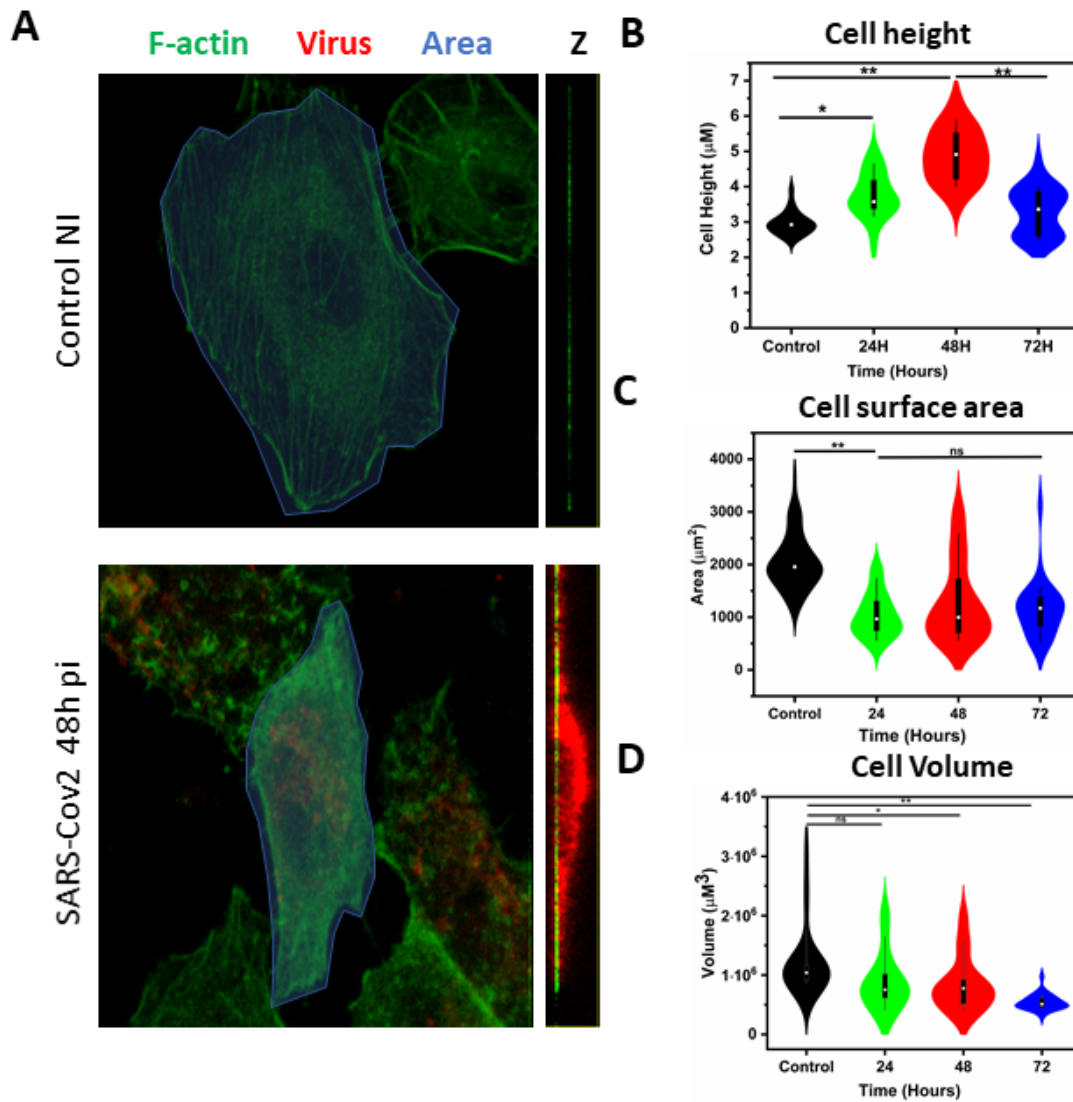

553

554

## Fig 2. Morphological changes of human pulmonary cells upon SARS-CoV-2 infection

555

556

557

558

559

560

561

562

563

564

565

566

567

Imaging and quantitative analysis of time course changes in morphology of SARS-CoV-2 infected A549-hACE2 cells. A549-hACE2 cells were fixed at 0h, 24h, 48h, and 72h post infection and processed for immunofluorescence. SARS membrane protein anti-M rabbit antibody and a secondary antibody Alexa Fluor 568 (in red) and for F-actin Phalloidin Alexa Fluor 488 were used for confocal microscopy. (A) Confocal images of Control and Infected A549-hACE2 cells (48h post infection). (B) Plot for cell height. (C) Plot for surface area of the cell. (D) plot for cell volume. All cell surface area, height, volume of infected and non-infected cells are calculated from actin and M protein spreading at XY and Z direction at different time of post infection, A number of  $20 < n < 50$  cells were analyzed from at least 3 independent experiments. Statistically significant analysis was evaluated using one-way ANOVA tests.  $**p < 0.05$ .

### A F-actin Orientation Map 48h pi by 2D STED

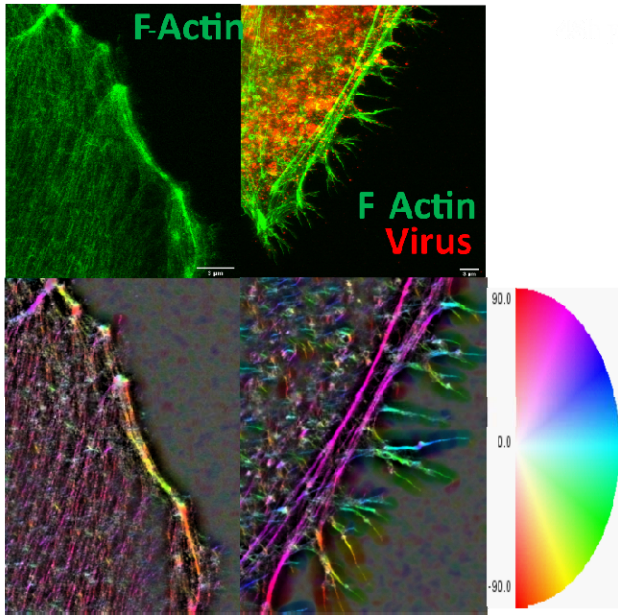

### B

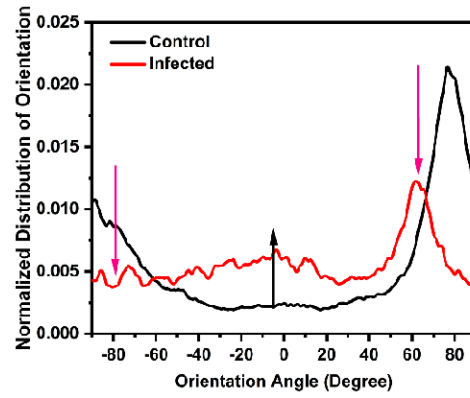

### C Internal F-actin nanostructures 48h pi by 2D STED

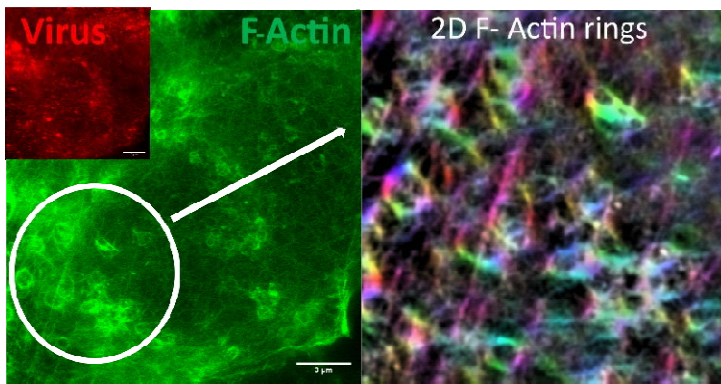

### D Actin rings diameter

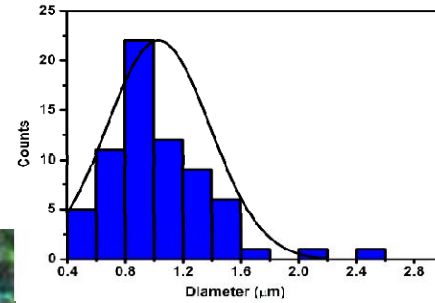

### Viral rings diameter

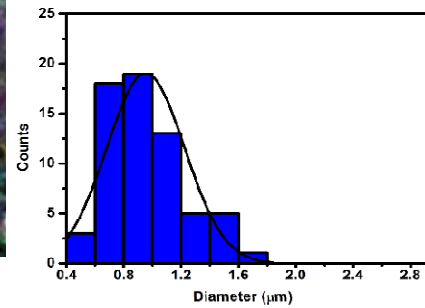

### E

### F-actin nanostructures with SARS-CoV2 48h pi by 3D STED

### TEM

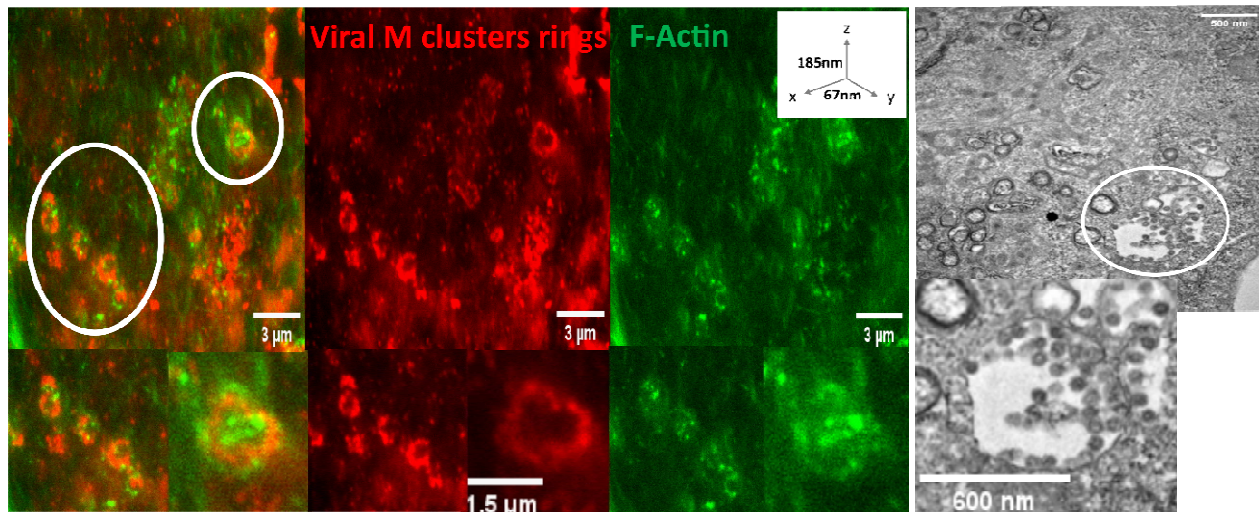

568

569

570

571

572 **Fig 3. Reorganization of F-actin nanostructures and intracellular actin ring formation in**  
573 **SARS-CoV-2 infected pulmonary cells**

574 STED 2D and 3D images of changes in F-actin and viral clusters of SARS-CoV-2 infected  
575 pulmonary cells. A549-hACE2 cells were fixed for control and 48h post infection  
576 processed for immunofluorescence coupled to STED microscopy. For imaging virus  
577 SARS membrane protein anti-M rabbit antibody and then secondary antibody Star orange  
578 (green) and for F-actin Phalloidin Star red (red) were used. (A) 2D STED images and  
579 color representation of orientation angle of F-actin network with (48h post infection) or  
580 without infection. (B) Plot for distribution of orientation angle, with (48h post infection)  
581 or without infection. (C) STED 2D images of actin ring with color representation of rings.  
582 (D) Plot for distribution of F-Actin rings and viral ring diameters. (E) STED 3D images of  
583 intracellular F-actin rings and viral M clusters in infected pulmonary cells. A number of  
584  $25 < n < 50$  cells were analyzed from at least 3 independent experiments. Statistical  
585 significant analysis were evaluated using one-way ANOVA tests.  $**p < 0.05$ .  
586 Transmission electron microscopy (TEM) images of intracellular structures filled with  
587 budding viruses in SARS-CoV-2 infected pulmonary cells. Scale bars are 500 to 600nm  
588 for the zoom image, as indicated.

589



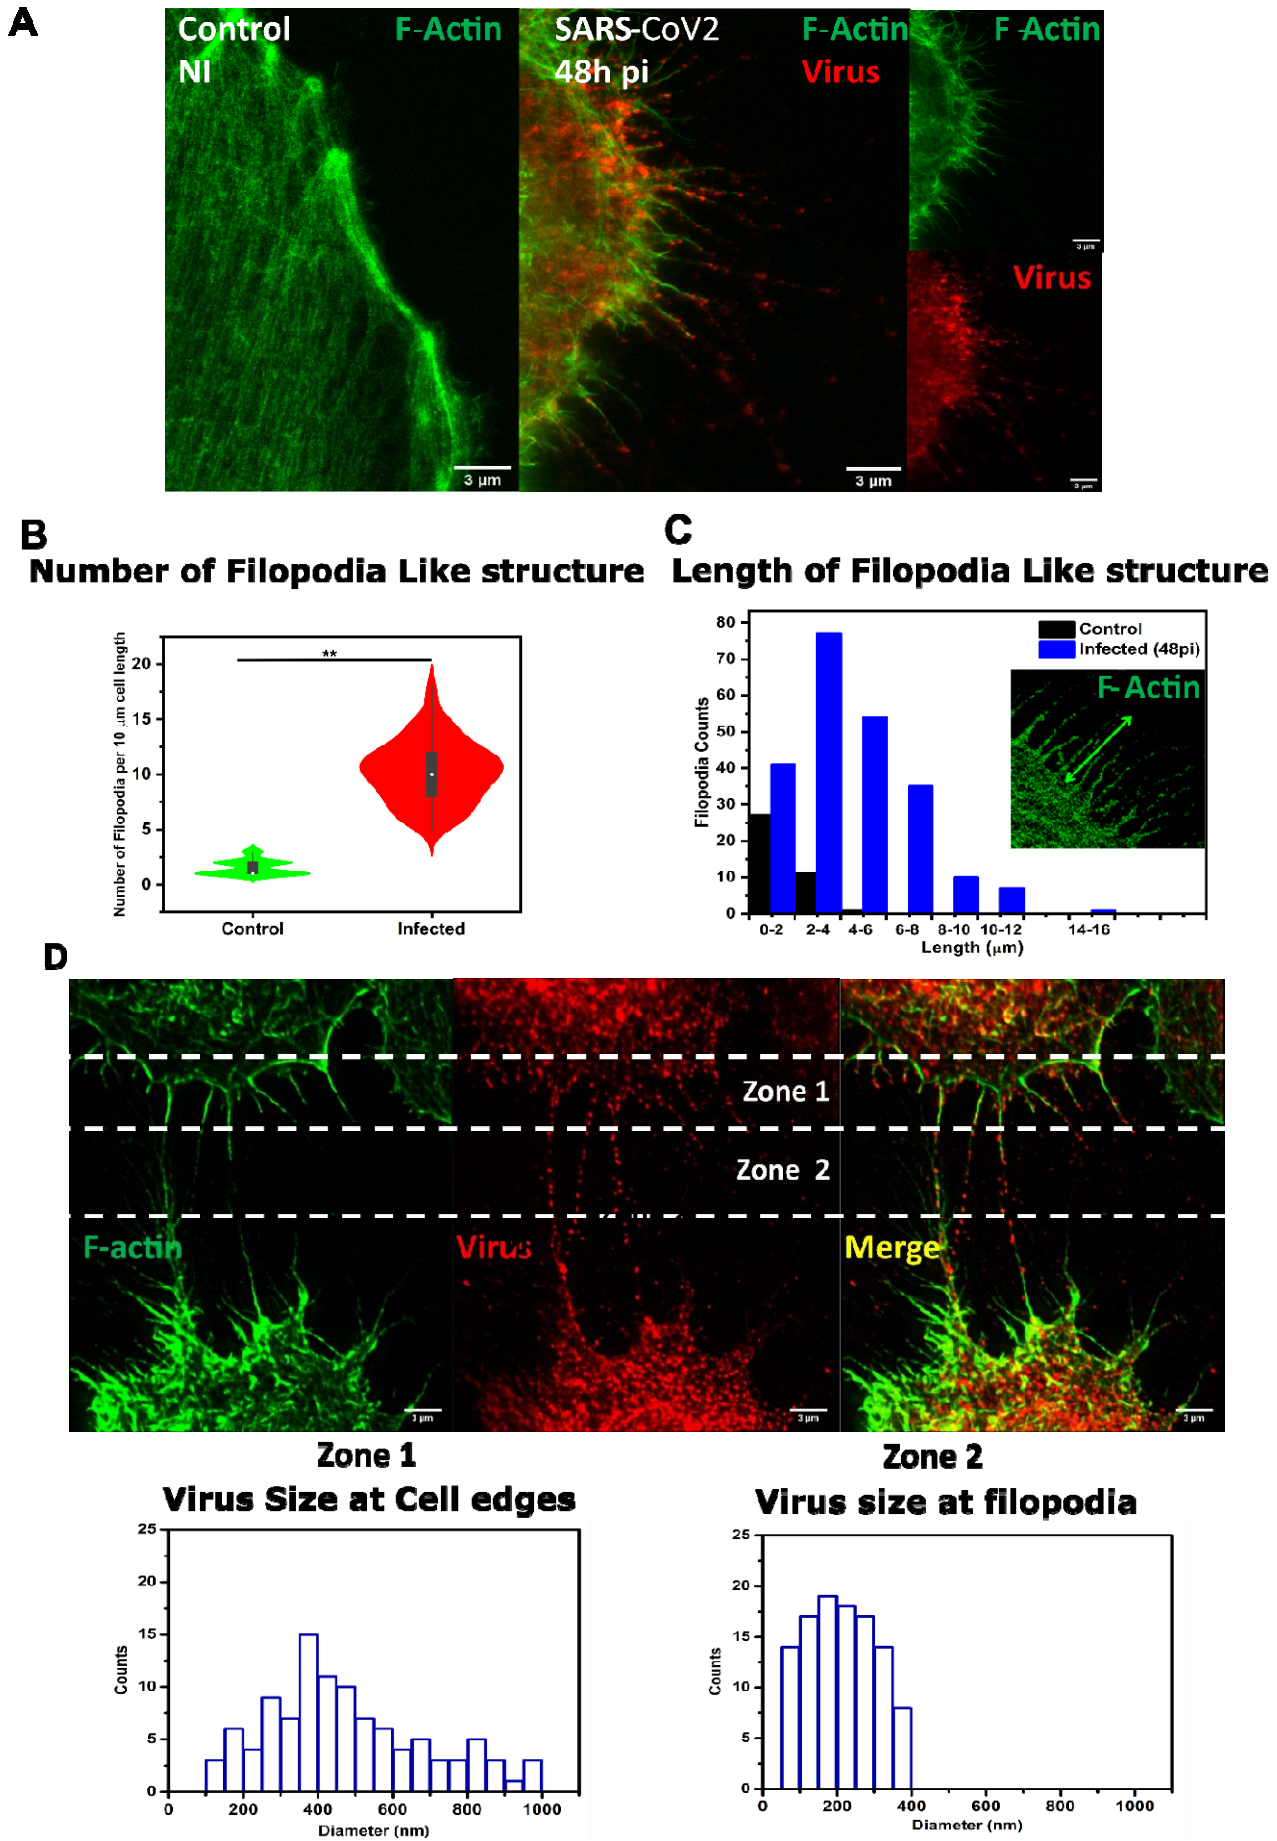



**Fig 4. Reorganization of actin fibers into virus loaded filopodia-like protrusions at the cell surface of SARS-CoV-2 infected pulmonary cells.**

STED 2D images and Quantitative data of changes in F-actin nanostructures in SARS-CoV-2 infected A549-hACE2 cells. A549-hACE2 cells were fixed for control and 48h post infection processed for immunostaining and STED microscopy. For imaging viral particles and clustered SARS membrane protein anti-M rabbit antibody and then secondary antibody Star orange (green) and for F- actin Phalloidin Star red (red) were used. (A) Merge STED 2D Images of control and 48h post infected pulmonary cells. (B) Plot for distribution of number of filopodia per 10 micrometer lengths of each cell infected and control. (C) Plot for distribution of length of individual filopodia in control and infected cells. (D) 3D projection Image and plots showing viral M cluster size at cell edge (Zone 1), at filopodia-like structures (Zone 2), and at cell-to-cell connections. A number of  $15 < n < 20$  cells were analyzed from at least 3 independent experiments. Statistical significant analysis were evaluated using one-way ANOVA tests.  $**p < 0.05$ .

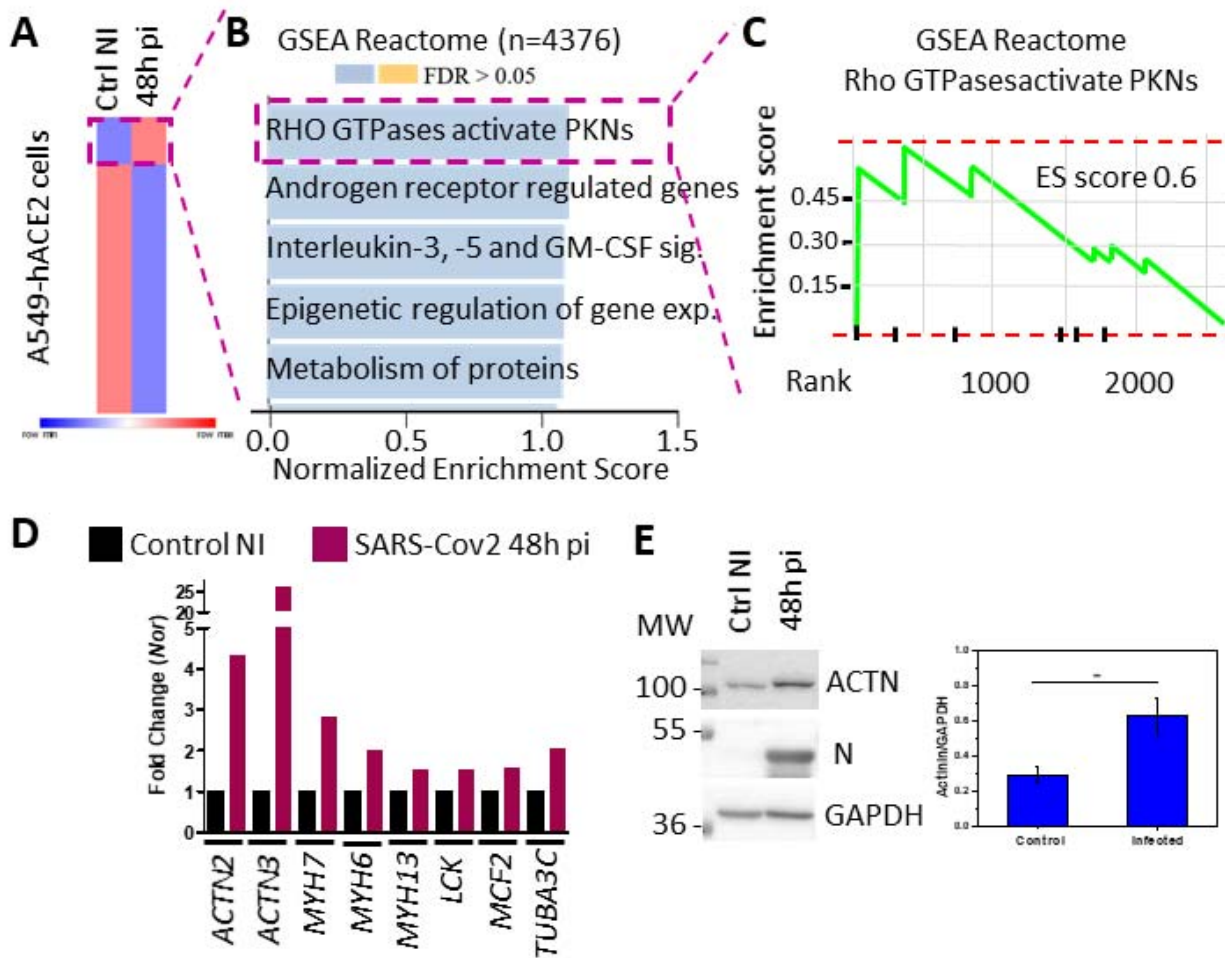

707  
708  
709

710 **Fig 5. Cellular gene expression analysis of SARS-CoV-2 infected human pulmonary cells**  
711 **using RNAseq reveals an upregulation of alpha-Actinins**

712 (A) Heat map showing RNA-seq-based expression analysis of differentially expressed  
713 transcripts in non-infected (Ctrl) and A549hACE2 cells infected with SARS-CoV-2 for  
714 48h (48h pi).  $n=44141$  differentially expressed transcripts; 2 individual cell replicates per  
715 condition. (B) *Top*. Reactome-based Gene Set Enrichment Analysis (GSEA) of candidates  
716 with  $FC \geq 2$  ( $n=4376$  upregulated transcripts) using WebGestalt (WEB-based Gene SeT  
717 AnaLysis Toolkit, 2019). *Bottom*. Panther-based Gene Set Enrichment Analysis (GSEA)  
718 of candidates with  $FC \leq 0.3$  ( $n=3136$  downregulated transcripts) using WebGestalt (WEB-  
719 based Gene SeT AnaLysis Toolkit, 2019). FDR: False Discovery Rate. (C) Reactome-  
720 based Gene Set Enrichment Analysis (GSEA) for Rho GTPases pathway of candidates  
721 with  $FC \geq 2$ . (D) Histogram plots representing the basal transcription activity (48h pi  
722 normalized to Control) of components of the Rho-GTPase pathway that are differentially  
723 expressed in Control and SARS-CoV-2 infected A549hACE2 cells.

724

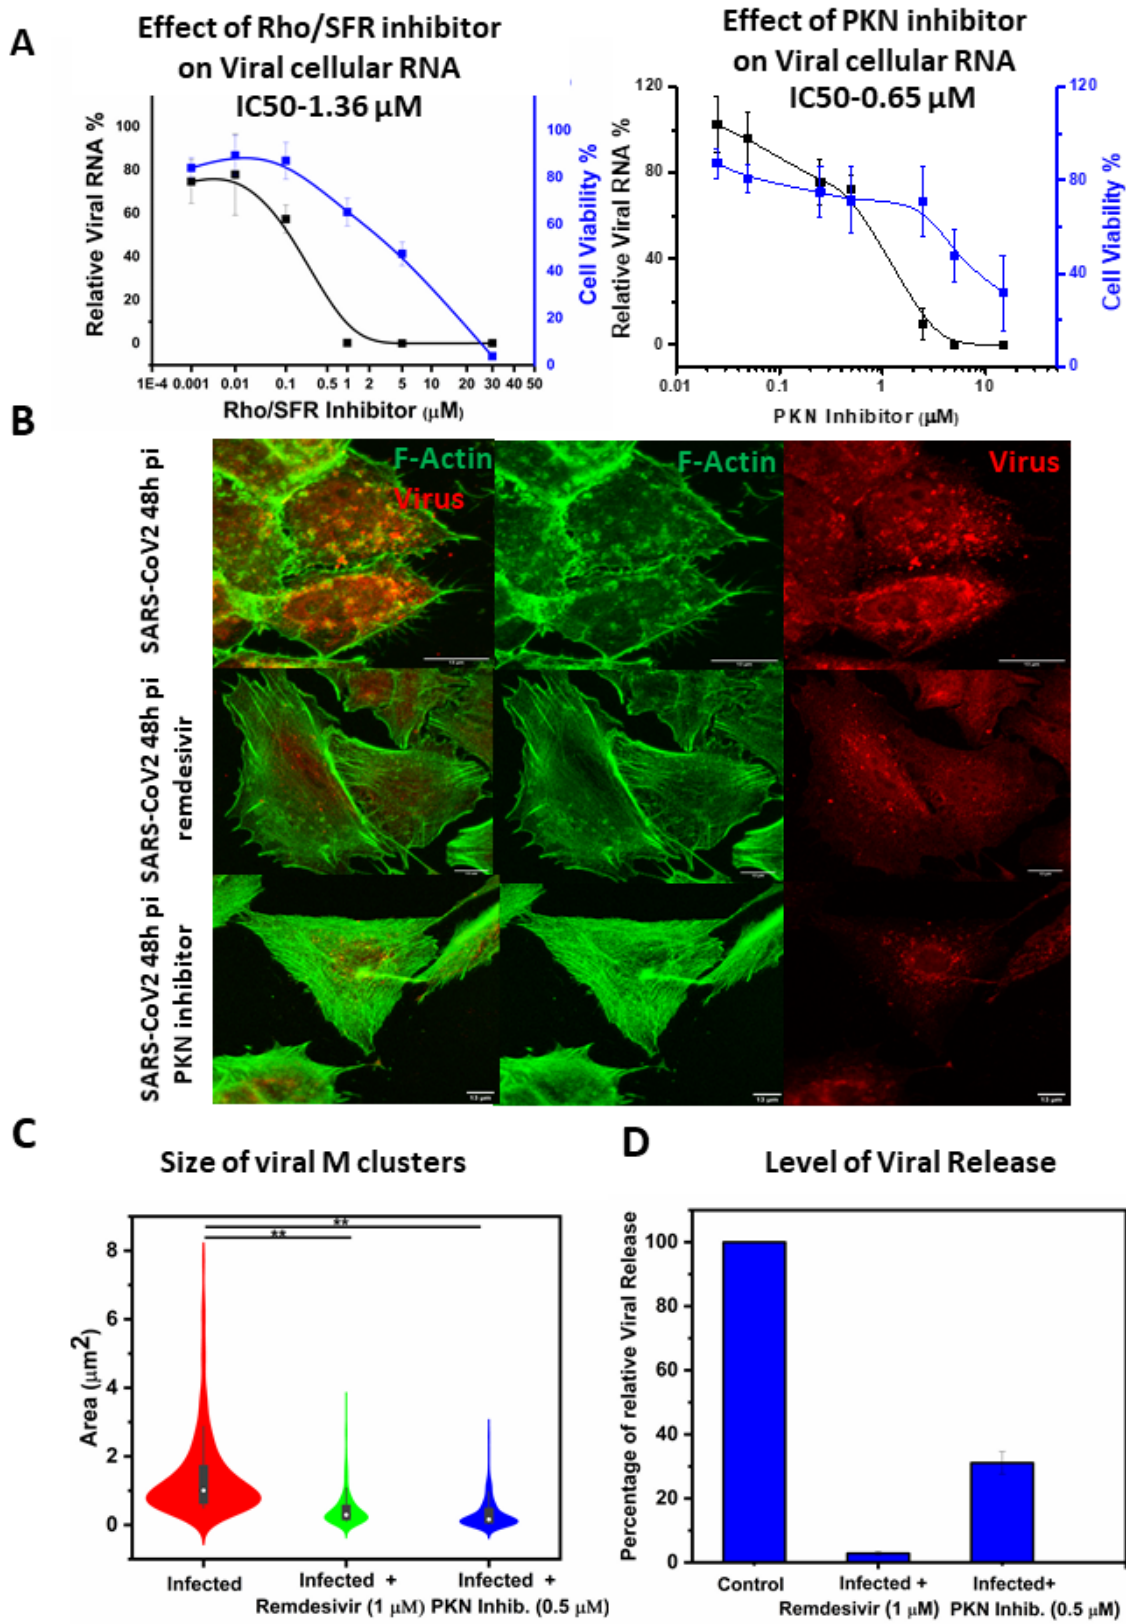

726 **Fig 6. Reduction of SARS-CoV-2 replication in pulmonary cells upon PKN and Rho/SFR**  
727 **inhibitors treatment accompanied with cellular F-actin and cell shape restoration**

728 (A) Dose effect of Rho/SFR and PKN inhibitors on SARS-CoV-2 replication in pulmonary  
729 cells using qRT-PCR and cell viability. (B) Confocal images of changes SARS-CoV-2  
730 infected A549-hACE2 cells with the treatment of Remdesivir (1 $\mu$ M) or PKN Inhibitor  
731 (0.5  $\mu$ M). (C) Plot for changes in viral clustered size with or without (infected) treatment  
732 of Remdesivir (1 $\mu$ M) or PKN Inhibitor (0.5  $\mu$ M). (D) Plot for Number of copies of  
733 RNA/ $\mu$ L in the supernatant of infected cells at 48h post infection. A549-hACE2 cells were  
734 fixed at 48h post infection and processed for immunofluorescence and laser confocal light  
735 microscopy using a SARS-CoV-2 membrane protein anti-M rabbit antibody and a  
736 secondary antibody Alexa Fluor 568 (in red) and for F-actin imaging Phalloidin Alexa  
737 flour 488 (Green) were used. A number of 15 <  $n$  < 20 cells were analyzed from at least 3  
738 independent experiments. Statistical significant analysis were evaluated using one-way  
739 ANOVA tests.  $**p < 0.05$ .

740  
741  
742  
743 **Supplementary Materials**

744  
745 see Supplementary Materials document.  
746  
747
